# Supplementary material for: Delicate substituent effect of isophthalate tectons on the structural assembly of diverse 4-connected metal–organic frameworks (MOFs)
Source: Royal Society of Chemistry journal article supplement (doi:10.1039/b904977k), 2009-01-01
Supplement: b904977k.pdf [file b904977k.pdf]

## Supporting Information for

### **Delicate substituent effect of isophthalate tectons on the structural assembly of diverse 4-connected metal-organic frameworks (MOFs)**

Lu-Fang Ma,<sup>a,b</sup> Yao-Yu Wang,<sup>\*a</sup> Jian-Qiang Liu,<sup>a</sup> Guo-Ping Yang,<sup>a</sup> Miao Du<sup>\*c</sup> and Li-Ya Wang<sup>\*b</sup>

<sup>a</sup> Key Laboratory of Synthetic and Natural Functional Molecule Chemistry of Ministry of Education, Department of Chemistry, Shaanxi Key Laboratory of Physico-Inorganic Chemistry, Northwest University, Xi'an 710069, P. R. China. E-mail: wyaoyu@nwu.edu.cn

<sup>b</sup> College of Chemistry and Chemical Engineering, Luoyang Normal University, Luoyang 471022, P. R. China. E-mail: wlya@lynu.edu.cn

<sup>c</sup> College of Chemistry and Life Science, Tianjin Normal University, Tianjin 300387, P. R. China. E-mail: dumiao@public.tpt.tj.cn

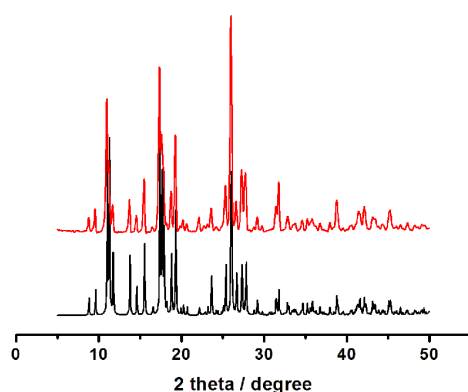

(1)

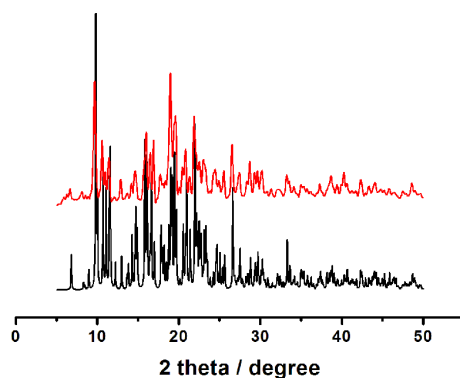

(2)

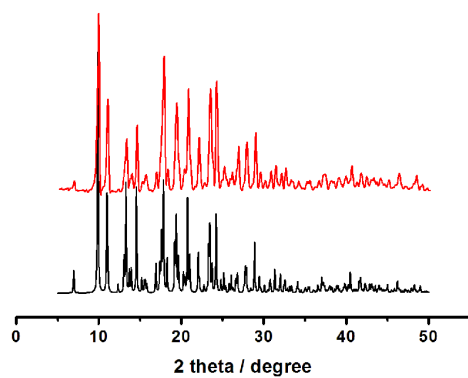

(3)

**Fig. S1.** XPRD patterns of complexes 1–3 for observed (black) and as-synthesized (red) samples.

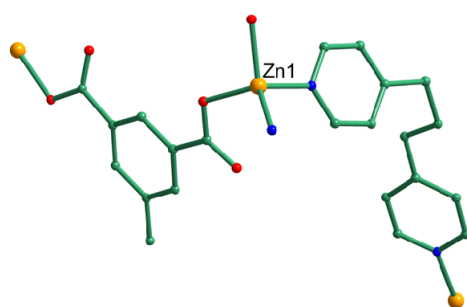

(1)

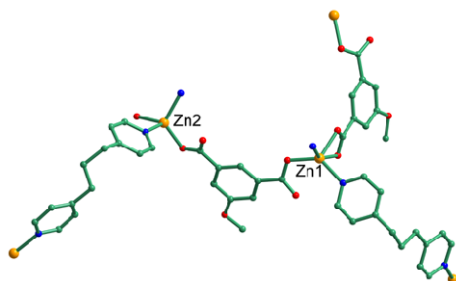

(2)

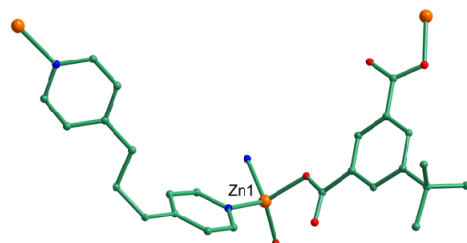

(3)

**Fig. S2.** Coordination environments of Zn<sup>II</sup> and binding modes of ligands in 1–3.

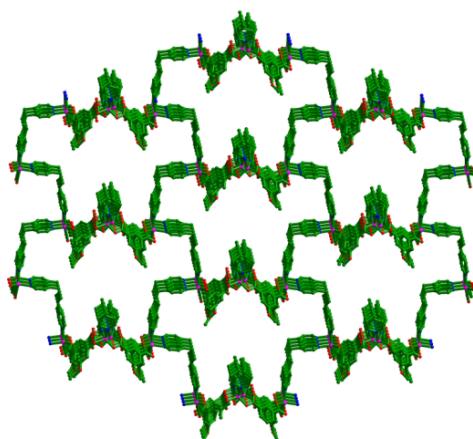

Fig. S3. 3-D coordination framework of **2**.

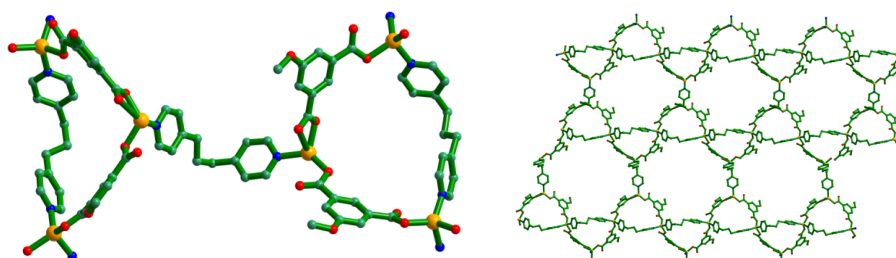

Fig. S4. Dumbbell-shaped structural unit and 2D coordination layer in **2**.

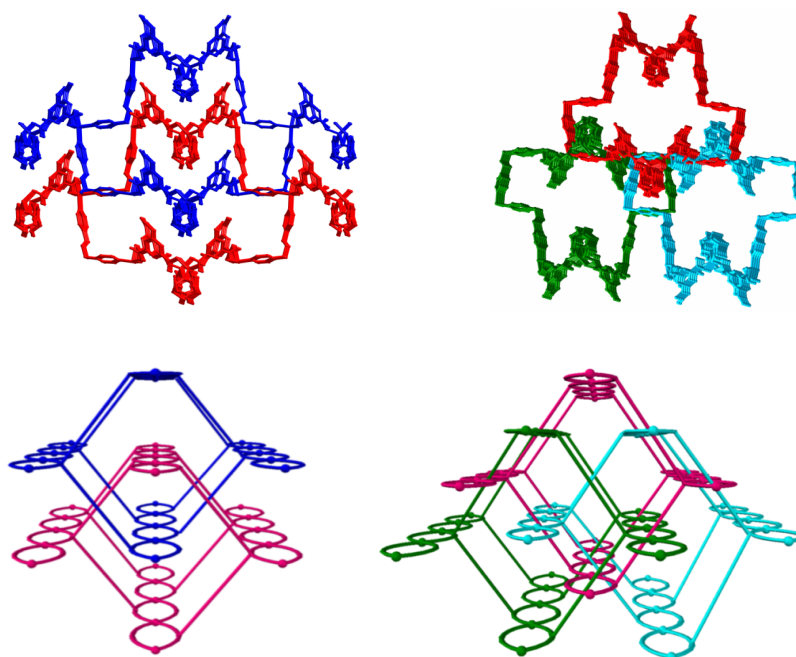

Fig. S5. Interpenetrating fashion of the 3-D coordination networks in **2**.

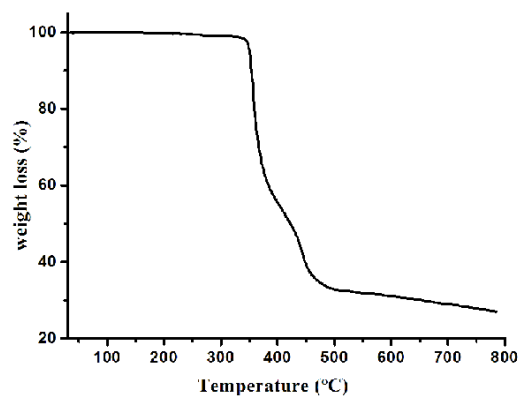

(1)

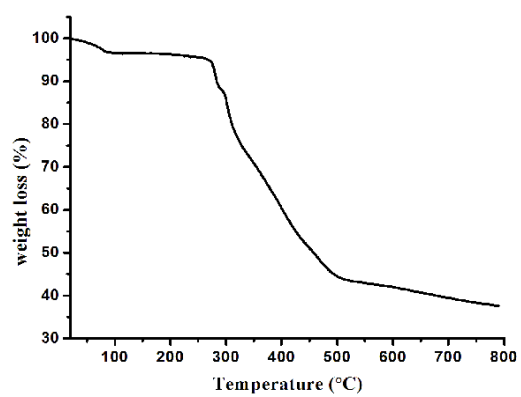

(2)

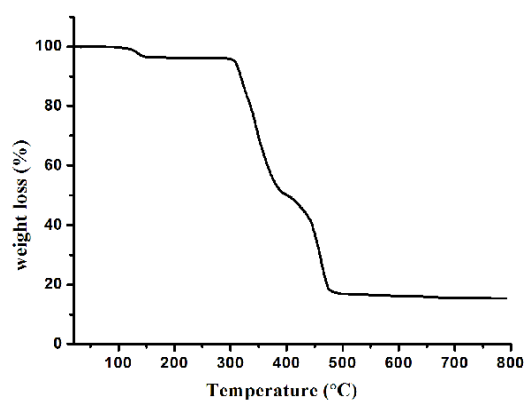

(3)

Fig. S6. TGA curves of complexes 1–3.

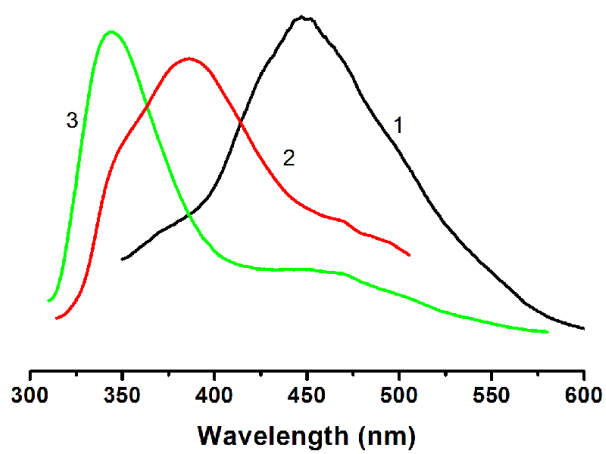

**Fig. S7.** Solid-state emission spectra of **1–3** at room temperature.
